# Supplementary material for: Quasi-weekly oscillation of regional PM2.5 transport over China driven by the synoptic-scale disturbance of East Asian Winter Monsoon circulation
Source: Copernicus journal article supplement (doi:10.5194/egusphere-2024-2493), 2024-09-18
Supplement: Supplementary file 1 [file egusphere-2024-2493-supplement.pdf]

# **Quasi-weekly oscillation of regional PM<sub>2.5</sub> transport over China driven by the synoptic-scale disturbance of East Asian Winter Monsoon circulation**

Yongqing Bai <sup>1</sup>, Tianliang Zhao <sup>2,\*</sup>, Kai Meng <sup>3,\*</sup>, Yue Zhou <sup>1</sup>, Jie Xiong <sup>1</sup>, Xiaoyun Sun <sup>4</sup>, Lijuan Shen <sup>5</sup>, Yanyu Yue <sup>1</sup>, Yan Zhu <sup>1</sup>, Weiyang Hu <sup>6</sup>, Jingyan Yao <sup>2</sup>

<sup>1</sup>China Meteorological Administration Basin Heavy Rainfall Key Laboratory/Hubei Key Laboratory for Heavy Rain Monitoring and Warning Research, Institute of Heavy Rain, China Meteorological Administration, Wuhan 430205, China

<sup>2</sup>Climate and Weather Disasters Collaborative Innovation Center, Key Laboratory for Aerosol-Cloud-Precipitation of China Meteorological Administration, Nanjing University of Information Science & Technology, Nanjing 210044, China

<sup>3</sup>Key Laboratory of Meteorology and Ecological Environment of Hebei Province, Hebei Provincial Institute of Meteorological Sciences, Shijiazhuang, 050021, China

<sup>4</sup>Anhui Province Key Laboratory of Atmospheric Science and Satellite Remote Sensing, Anhui Institute of Meteorological Sciences, Hefei 230031, China

<sup>5</sup>School of Atmosphere and Remote Sensing, Wuxi University, Wuxi, 214105, China

<sup>6</sup>State Key Laboratory of Pollution Control and Resource Reuse and School of the Environment, Nanjing University, Nanjing 210023, China

*Correspondence to:* Tianliang Zhao (tlzhao@nuist.edu.cn) and Kai Meng (macka@foxmail.com)

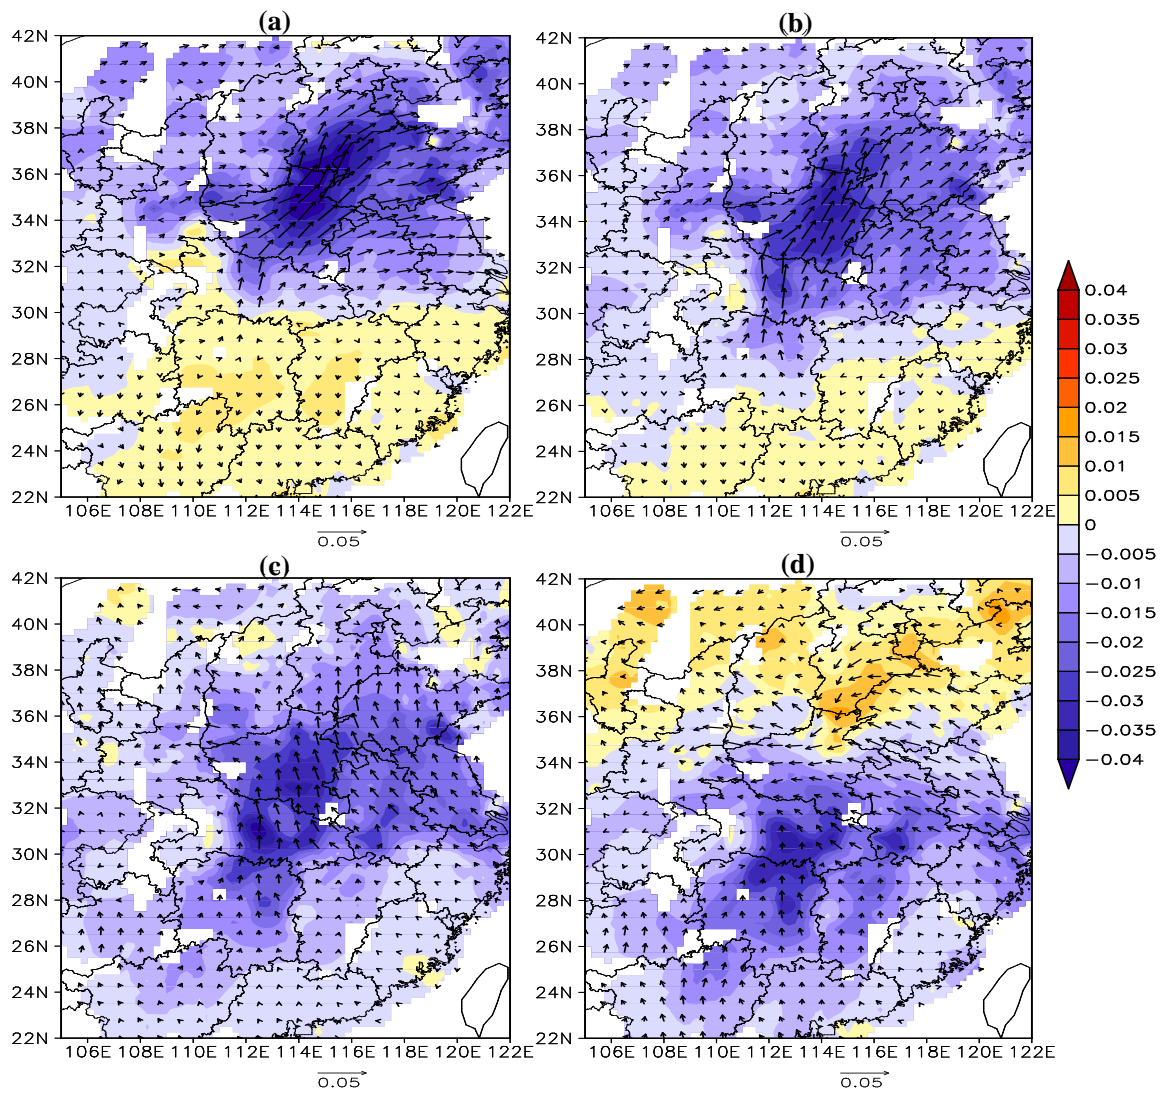

**Figure S1.** Same as Fig. 2. (a)-(d) The last four phases (days) of QWO (8-d) of the regional  $PM_{2.5}$  transport over CEC. The loads of  $PM_{2.5}$  TFM anomalies (color contours) for EEOF2 and TFV anomalies (vectors) for EEOF1 with lag time (a) 4 d, (b) 5 d, and loads of TFM anomalies (color contours) for EEOF3 and TFV anomalies (vectors) for EEOF2 with lag time (c) 0 d, (d) 1 d over CEC in the winters of 2015-2019.

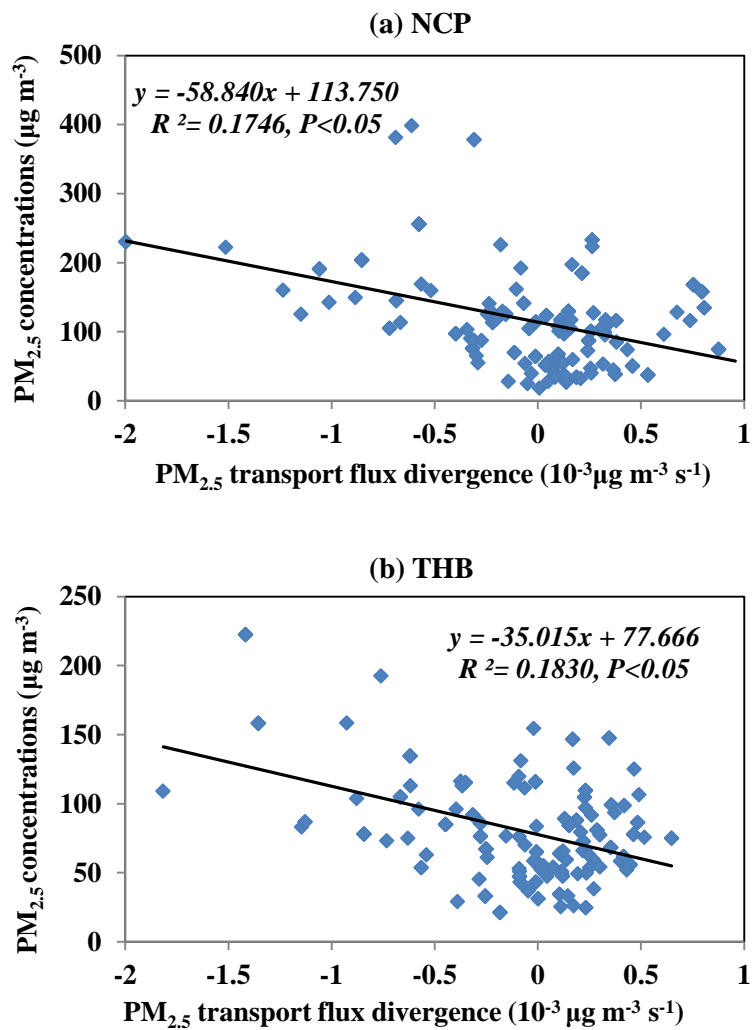

**Figure S2.** Scatter plot of PM<sub>2.5</sub> transport flux divergences and PM<sub>2.5</sub> concentrations over (a) NCP and (b) THB during the 23 typical events of regional PM<sub>2.5</sub> transport over CEC.

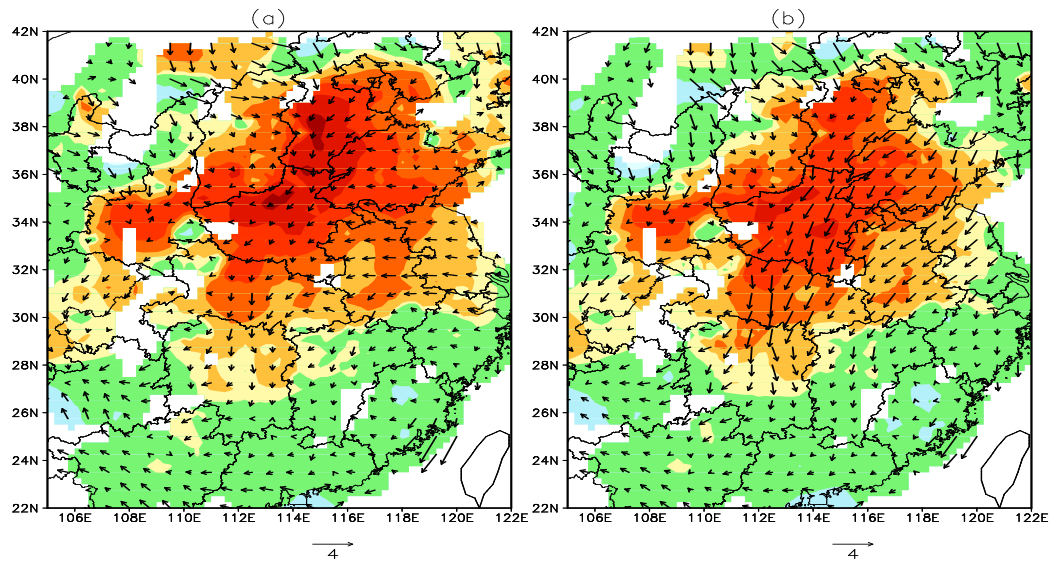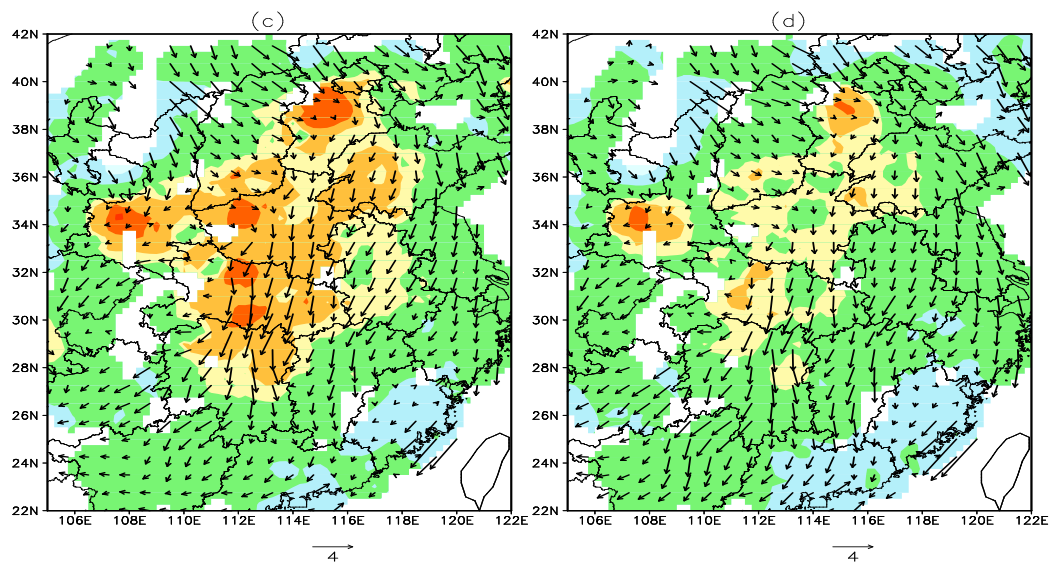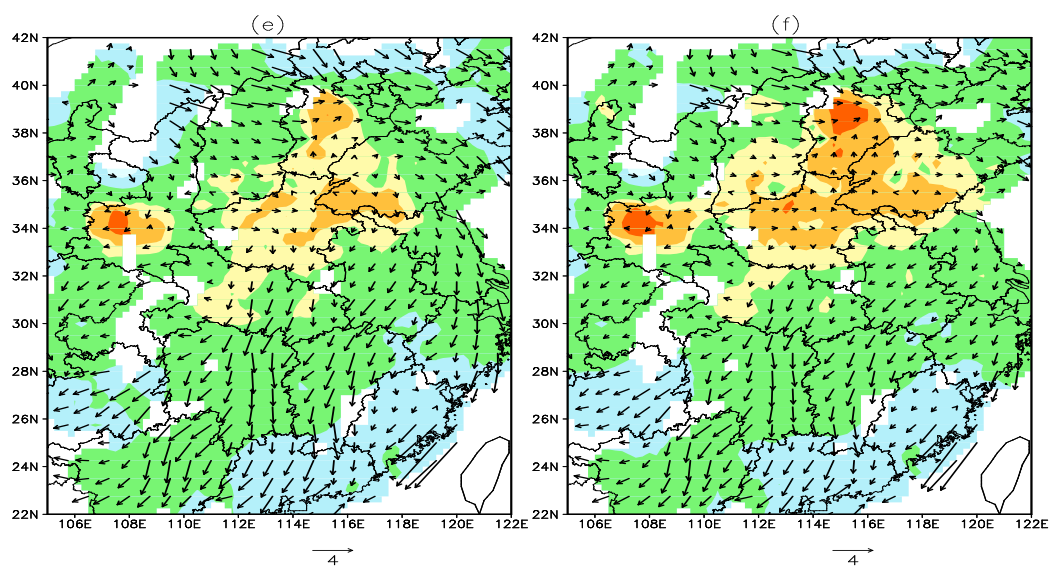

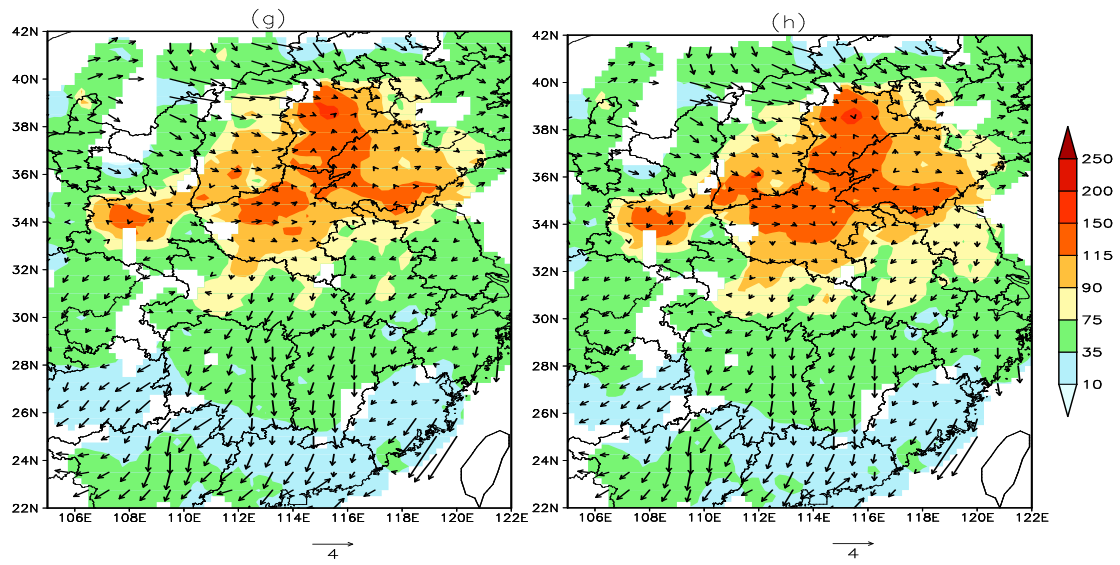

**Figure S3.** The composited PM<sub>2.5</sub> concentrations (color contours, unit:  $\mu\text{g m}^{-3}$ ) and 10-m wind (vector, unit:  $\text{m s}^{-1}$ ) in the 8 phases (a-h) of QWO during the 23 typical events of regional PM<sub>2.5</sub> transport over CEC.

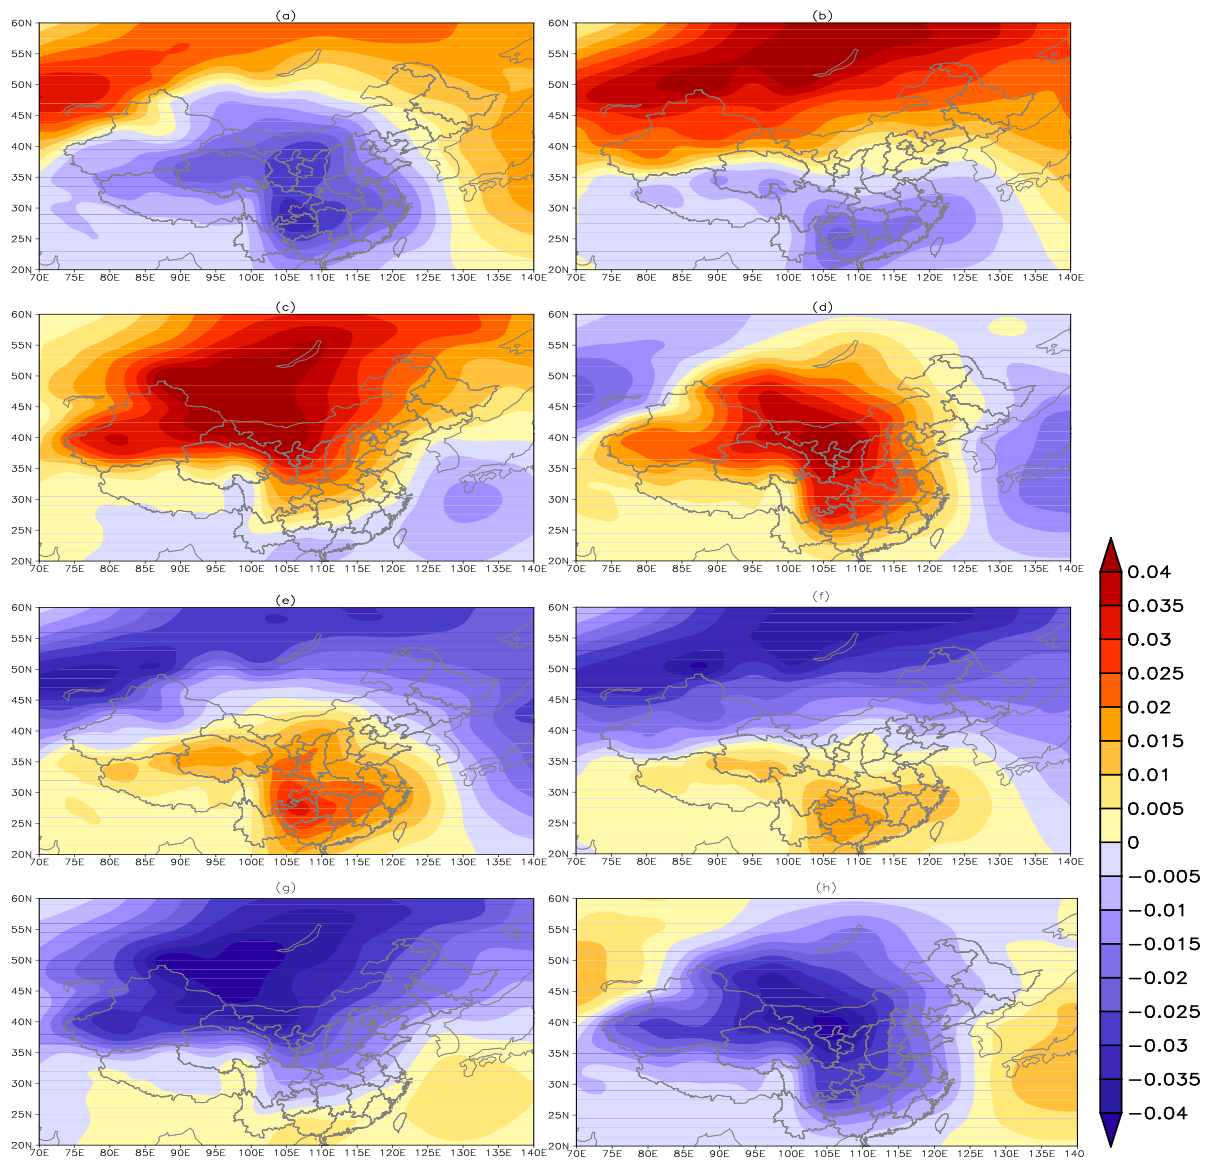

**Figure S4.** EEOF analysis of the  $SLP_{QWO}$  in the winters of 2015-2019, and the 8-d QWO formed by the lag time (a) 1 d, (b) 2 d, (c) 3 d, (d) 4 d, (e) 5 d of its second mode and by the lag time (f) 0 d, (g) 1 d, (h) 2 d of its first mode. The color contours represent the loads of  $SLP_{QWO}$ .
